## 26 ABSTRACT

### 27 Background

28 COVID-19 appears to have caused less severe outbreaks in many low- and middle-income  
29 countries (LMIC) compared with high-income countries, possibly because of differing  
30 demographics, socio-economics, climate, surveillance, and policy responses. The Philippines  
31 is a LMIC that has had a relatively severe COVID-19 outbreak but has recently curtailed  
32 transmission while gradually easing interventions.

### 33 Methods

34 We applied an age-structured compartmental model that incorporated time-varying mobility,  
35 testing, and personal protective behaviors (through a “Minimum Health Standards” policy,  
36 MHS) to represent the Philippines COVID-19 epidemic nationally and for three highly  
37 affected regions (Calabarzon, Central Visayas, and the National Capital Region). We  
38 estimated effects of control measures, key epidemiological parameters, and projected the  
39 impacts of easing interventions.

### 40 Results

41 Population age structure, contact rates, mobility, testing, and MHS were sufficient to explain  
42 the Philippines epidemic based on the good fit between modelled and reported cases,  
43 hospitalisations, and deaths. Several of the fitted epidemiological parameters were consistent  
44 with those reported in high-income settings. The model indicated that MHS reduced the  
45 probability of transmission per contact by 15-32%. The December 2020 case detection rate  
46 was estimated at ~14%, population recovered at ~12%, and scenario projections indicated  
47 high sensitivity to MHS adherence.

## 48 Conclusions

49 COVID-19 dynamics in the Philippines are driven by age, contact structure, and mobility,

50 and the epidemic can be understood within a similar framework as for high-income settings.

51 Continued compliance with low-cost MHS measures should allow the Philippines to maintain

52 epidemic control, but disease resurgence remains a threat due to low population immunity

53 and detection rates.

## 54 KEYWORDS

55 COVID-19, Philippines, LMIC, SEIR, age-structured, disease transmission

56

## 57 BACKGROUND

58 Coronavirus 2019 (COVID-19) epidemiology differs across settings with apparently less

59 severe outbreaks in many low- and middle-income countries (LMIC) compared with high

60 income countries (HIC), such that understanding why LMIC are less affected is critical to

61 understanding global epidemiology. Multiple demographic and socio-economic factors likely

62 drive differential COVID-19 burden across income groups. Expansive population pyramids

63 and tropical climates may reduce COVID-19 transmission and severe disease in many LMIC

64 (1–3), while high contact rates, high prevalence of comorbidities, high population densities,

65 and limited healthcare capacity could increase burden (4–8). While many LMIC have had

66 lower COVID-19 burdens than HIC, weak surveillance systems (9) could also affect

67 epidemic estimates. Nonetheless, understanding why LMIC have had apparently less severe

68 outbreaks could help other countries better control their epidemics.

69

70 Most countries have implemented multiple non-pharmaceutical interventions (NPIs) to curtail

71 COVID-19 transmission; although initially successful, easing restrictions has led to second,

72 apparently larger, waves of transmission (10) in many HIC, while similar levels of disease  
73 resurgence have not occurred in many LMIC. Importantly, testing rates have increased  
74 substantially between the first and second waves of transmission, which could account for  
75 some of the increased case numbers. There are three broad categories of NPIs, those that aim  
76 to: (i) isolate infected individuals and their contacts; (ii) reduce contact between infected and  
77 susceptible people (henceforward “macrodistancing”); and (iii) reduce transmission given  
78 contact between infected and susceptible people (henceforward “microdistancing”). Most  
79 HIC have enforced initiatives for all three types of NPIs with a focus on long, strict  
80 macrodistancing interventions through stay-at-home orders. LMIC have also employed  
81 macrodistancing policies but often with shorter, less strict orders because these types of  
82 initiatives exacerbate poverty and have societal costs (11,12) that LMIC cannot withstand.  
83 Relaxing of short-term macrodistancing policies would be expected to lead to disease  
84 resurgence (13), which runs counter to the experience of many LMIC. A meta-analysis  
85 indicates that inexpensive microdistancing policies (e.g., wearing face masks) can be highly  
86 effective (14) and therefore could explain why many LMIC are continuing to suppress  
87 transmission after an initial period of macrodistancing.

88

89 The Philippines is one of the most severely affected countries by COVID-19 in the Western  
90 Pacific Region, but has also succeeded in curtailing the epidemic while easing their most  
91 restrictive quarantine measures. Here we investigate COVID-19 epidemiology in the  
92 Philippines and the effectiveness and sensitivity to microdistancing policies. The Philippines  
93 is a LMIC that has had over 459,000 confirmed cases and more than 8,500 deaths as of 20th  
94 December 2020, although control has improved over recent months (15). In the continued  
95 absence of a vaccine, various NPIs have been implemented in the country, with the timing  
96 and level of restriction varying by region. The NPIs implemented include different levels of

97 community quarantines, including school closures. Since October 2020, the Philippines has  
98 shifted from a focus on community quarantine orders towards greater reliance on Minimum  
99 Health Standards (MHS) policies, requiring the use of face coverings, physical distancing,  
100 and hand hygiene. To gain insights into the Philippines epidemic, we present a data-driven  
101 COVID-19 model, which includes age structure, heterogeneous contact patterns, time-  
102 varying testing rates, and macro- and microdistancing. We use this model to 1) estimate  
103 epidemiological parameters for COVID-19 in a LMIC for comparison with HIC; 2) consider  
104 the past effect of NPIs; and 3) create scenarios for various policy changes and estimate  
105 associated risk of disease resurgence.

## 106 METHODS

### 107 Model

108 We developed an age-structured deterministic compartmental model of SARS-CoV-2  
109 transmission, the virus that causes COVID-19, to model disease spread at the national level,  
110 and for three highly affected regions: Calabarzon (Region IV-A), Central Visayas (Region  
111 VII), and the National Capital Region (Metro Manila). We included six sequential  
112 compartments in the model representing susceptible, non-infectious exposed, infectious  
113 exposed, early actively infectious, late actively infectious, and recovered/removed persons  
114 (Fig. 1A), and stratified the infectious compartments by detection status and disease severity  
115 (Fig. 1B). To account for age-dependent disease processes, we stratified all model  
116 compartments by age group using 5-year age bands from birth to  $\geq 75$  years of age and  
117 allowed the proportion symptomatic, susceptibility to infection, infection fatality rate, and the  
118 probability of hospitalisation to differ by age group. We used the 2020 projected population  
119 distribution by age from the Philippines Statistics Authority for the total population sizes of  
120 each age group, which we then split among compartments (Figs. 1C, S1). To introduce

121 heterogeneous mixing by age, we incorporated synthetic mixing matrices developed by Prem  
122 *et al.* 2017 (16) (Fig. 1D).

123

124 We considered several inter-compartmental transition rates to represent epidemiologically  
125 important processes. To estimate disease incidence, detected cases, hospitalisation, and ICU  
126 admission rates, we quantified transitions between different exposed and infectious  
127 compartments within the model (Fig. 1A-B, supplemental material). To calculate a modelled  
128 case detection rate, we calculated the proportion of symptomatic cases that were detected  
129 (Fig. 1B). We related the case detection rate (CDR, equation 1) to the daily number of per  
130 capita tests performed using an exponential function, under the assumption that a certain  
131 testing rate is associated with a specific case detection rate (with this parameter varied in  
132 calibration):

133

Equation 1

$$CDR_{time} = 1 - \exp\left(\frac{-b * tests_{time}}{10,000}\right)$$

134 Non-pharmaceutical interventions

135 We simulated community quarantines (e.g., business closures and working from home) by  
136 varying the relative contribution of four locations to an overall age-specific dynamic mixing  
137 matrix (Fig. 1E). Using Google mobility data (<https://www.google.com/covid19/mobility/>),  
138 we scaled the household contribution to the matrix with residential mobility; the work  
139 contribution with workplace mobility; and the contribution from other locations (contacts  
140 outside of schools, homes, and work) with average mobility from all other Google mobility  
141 locations (Fig. 1E). We simulated school closures by scaling school contribution according to  
142 the proportion of children attending schools under relevant policies. In the Philippines, school  
143 closures started in mid-March 2020 in the most highly affected areas and schools have  
144 remained closed throughout the country through December 2020.

145

146 We simulated MHS as a scaled function that proportionally reduces the probability of  
147 transmission given contact (reducing the probability of an infected person passing on the  
148 infection and the probability of a contact being infected). We allowed the function to scale  
149 from zero when we assumed minimal compliance with MHS (15th August 2020) to a  
150 maximum value estimated by the calibration process (described below) when MHS was  
151 widely adopted (15th November 2020).

152 Calibration

153

154 We calibrated the model to data to reproduce local COVID-19 dynamics and compare  
155 estimations of key epidemiological parameters with prior estimates from HIC (Table 1). We  
156 used three sources of local data as calibration targets: daily confirmed cases (determined by  
157 RT-PCR) and the most recent estimate of ICU occupancy and cumulative deaths. We  
158 prioritized confirmed cases in the calibration process because these data are considered the  
159 highest quality in the Philippines for COVID-19 (based on expert opinion), while limiting the  
160 use of ICU and mortality data to the most recent values, as the quality of these data improved  
161 over time. To account for differences between weekday and weekend reporting, we smoothed  
162 daily confirmed cases using a seven day moving average. We fit the model to the three  
163 calibration targets using an adaptive Metropolis algorithm (17) (Table 1; supplemental  
164 material). For the prior distributions of epidemiological calibration parameters, we used  
165 uniform priors for highly uncertain quantities and truncated normal distributions for  
166 quantities informed by epidemiological evidence (Table 1; supplemental material). To  
167 account for potential differences between HIC and LMIC, we included “adjuster” parameters  
168 to modify the proportion of symptomatic individuals, proportion of symptomatic individuals  
169 hospitalised, and the infection fatality rate as the prior distributions are based on estimates

170 from HIC. The adjuster values are multiplicative factors applied to the odds ratio, where an  
171 adjuster value of one would indicate no adjustment is needed, a value below one would  
172 indicate the parameter is lower in the Philippines, and a value above one would indicate the  
173 parameter is higher in the Philippines. To calibrate the model, we ran seven independent  
174 chains with approximately 1000 iterations per chain and discarded the first 200 iterations as  
175 burn-in. We used Latin Hypercube Sampling across the multidimensional parameter space to  
176 select initial parameter conditions. We structured the model, calibration data, likelihood  
177 function, and priors identically for the national and regional models. We report the model  
178 outputs as median values with 25-75 and 2.5-97.5 percentiles to show uncertainty.

179

## 180 Scenarios

181 We ran scenarios with different policy changes to estimate future COVID-19 transmission  
182 and potential for disease resurgence with easing different interventions. The baseline scenario  
183 held mobility and MHS constant based on the most recent date of data (8th December 2020)  
184 through the end of the scenario period (1st June 2021). All scenarios began on 10th  
185 December 2020, with the exception of school reopenings, which began on 10th January 2021.  
186 We simulated 50% return of onsite workers by increasing the relative contribution of  
187 workplace mobility in the overall age-specific mixing matrix from current levels to current  
188 levels plus half the difference between current workplace mobility and pre-COVID  
189 workplace mobility. We simulated school reopenings by scaling school contribution in the  
190 overall age-specific mixing matrix from zero to one on the scenario start date (10th January  
191 2021) to reflect full school attendance. To estimate the effect of easing MHS by 50, 70, and  
192 100%, we decreased the microdistancing function, which reduces the values of all elements  
193 of the mixing matrices by a certain proportion, to 0.5, 0.3, and 0.0, respectively. We report  
194 the scenarios as median values with 25-75 and 2.5-97.5 percentiles to show uncertainty.



## 195 RESULTS

### 196 Epidemiological fit

197

198 The model reproduced national and regional trends in confirmed cases, hospitalisations, and  
199 deaths when incorporating changes in movement and adherence to MHS. The model fit was  
200 considerably better with the inclusion of both community quarantine-adjusted movement and  
201 adherence to MHS compared with a counterfactual scenario that only included community  
202 quarantines (Figs. 2, S5-7). These results suggest that if MHS had not been implemented,  
203 there would have likely been eight times as many cases at the outbreak peak. The four  
204 calibrated models (national and three regional models) show good fit to confirmed cases  
205 (Figs. 2-3). Additionally, the Central Visayas and the National Capital Region models show  
206 good fit to cumulative deaths and ICU occupancy, while the national and Calabarzon models  
207 overpredict these two indicators (Figs. 4, S8-10). We estimated an attack rate of  
208 approximately 12% (95% CI = 4-61%) as of 9th December 2020 (Fig. 4).

209

### 210 Parameter and case detection estimation

211

212 We estimated key epidemiological parameters and transition rates (Table 1; Fig. S11). The  
213 posterior distribution of the incubation period, infectious period, and baseline probability of  
214 transmission per contact did not differ markedly from their prior distributions, obtained from  
215 the literature. We incorporated parameters to adjust the proportion of symptomatic  
216 individuals, the proportion of symptomatic individuals hospitalised, and the infection fatality  
217 rate from the baseline values and estimated all three adjuster parameters at approximately  
218 one, indicating no modification was needed. The maximum effect of MHS was estimated at  
219 around 0.23 (95% CI = 0.15 - 0.32) with a tight posterior distribution (Fig. S11), suggesting  
220 that MHS has reduced the risk of transmission per contact by about 23%. The model case

221 detection was estimated at approximately 11 to 25% in the Philippines (Fig. S12), although  
222 the posterior distribution of this value was broad (Fig. S11).

223

224 Scenario projections

225 We projected transmission in the near term under a range of possible scenarios and show that  
226 epidemic trajectories are highly sensitive to compliance with MHS. Moreover, allowing  
227 home workers to return onsite while maintaining MHS is estimated to have limited impact on  
228 overall incidence, hospital occupancy, and mortality (Fig. 5). If current conditions are carried  
229 forward, transmission is projected to continue at low levels and therefore should not  
230 overwhelm hospital capacity or lead to excessive deaths. Allowing students to return to  
231 school is estimated to result in a moderate increase in incidence, hospital occupancy, and  
232 deaths. Reducing the effectiveness of MHS by 50% is projected to lead to a steady increase in  
233 burden, whereas reducing the effectiveness of MHS by 70% or 100% is projected to lead to a  
234 major resurgence in disease rates, associated hospitalisations, and deaths.

235

236 DISCUSSION

237 Younger age distributions and more intergenerational contacts, combined with changes in  
238 mobility and personal protective behaviors, appear to explain why the Philippines has  
239 sustained a relatively less severe COVID-19 outbreak than high income countries (HIC). The  
240 results from this study provide evidence that COVID-19 epidemiology in the Philippines is  
241 not inherently different from HIC. For instance, hospitalisations and infection fatality rates do  
242 not appear different from HIC, as would have been expected if healthcare capacity limitations  
243 and high prevalence of comorbidities drive disease severity and mortality rates; these findings  
244 support studies in some other LMIC (e.g., India; 18) but not others where excess deaths were  
245 considered (e.g., Brazil; 19). This highlights the importance of strong surveillance and

246 reporting systems for understanding COVID-19 epidemiology. Younger populations typical  
247 of LMIC may reduce disease burden in two ways: 1) a proportionally smaller percent of the  
248 population is elderly (compared with HIC) and at highest risk of severe disease and mortality  
249 from COVID-19 (1,2); and 2) those who survive to old age are often of higher socioeconomic  
250 status and may have a disproportionately lower infection risk compared with the general  
251 population (20). More intergenerational contacts in LMIC may also lower disease burden  
252 because elderly people often reside with family rather than in aged-care facilities, which have  
253 driven outbreak clusters in many HIC (e.g., 21). An important finding of this study is that  
254 adherence to MHS is largely responsible for limiting transmission in the Philippines while  
255 gradually easing quarantines. These results were consistent across regions that span a wide  
256 population density gradient, suggesting that this approach could also be effective in other  
257 similar settings. These types of personal protective measures will likely continue to be needed  
258 after a vaccine becomes available, as distribution may take months or years, and vaccination  
259 may not prevent onward transmission, and herd immunity may be difficult to attain in many  
260 countries (22).

261  
262 Current transmission trends in the Philippines (as of December 2020) indicate that the  
263 country is now effectively suppressing COVID-19, but disease resurgence remains a major  
264 threat without a widely available vaccine. Confirmed cases have decreased across the  
265 Philippines, plateauing at approximately 1,500 confirmed cases per day in the last few  
266 months of 2020, leaving most healthcare facilities with ample ICU capacity. As people  
267 resume semi-normal activities while maintaining MHS, low levels of transmission are likely  
268 to continue, but should not overwhelm the healthcare system. The results of this study  
269 support continuing a suppression approach as a bridge to broad-scale vaccination. To support  
270 this effort, we provided real-time weekly updates of the model outputs directly to policy-

271 makers through the Department of Health COVID-19 Philippines Local Government Units  
272 Monitoring Platform (<https://fasser.ehealth.ph/covid19/>). The scenarios we considered in  
273 this study indicate that relaxing societal restrictions like work-from-home orders and school  
274 closures are not predicted to cause substantial disease resurgence. However, we acknowledge  
275 that even with low levels of transmission and compliance with personal protective measures,  
276 school outbreaks can occur (e.g., 23). Despite these findings, low case detection (11-25%)  
277 and percentage recovered (<15%) and high sensitivity to maintaining MHS could lead to  
278 disease resurgence. Limited testing is a major obstacle for the Philippines (24) and many  
279 other LMIC and can hinder our understanding of how the epidemic is progressing and  
280 associated response measures needed to prevent disease resurgence.

281  
282 There are several important limitations relevant to interpreting the model results, including  
283 modelling assumptions, data limitations, and uncertainty. Most epidemiological parameters  
284 for COVID-19 used in this study were estimated from HIC (or China). While we included  
285 “adjuster” parameters to allow the symptomatic proportion, hospitalisation, and mortality  
286 rates to vary for the Philippines (similar to 25), we assumed that other parameters were  
287 similar to HIC, which may be inaccurate. However, most parameter estimates appear  
288 reasonable given previously reported COVID-19 epidemiology in the Philippines (26). When  
289 more data becomes available from the Philippines or similar settings, the current model can  
290 be updated with new parameter values. Data issues made modelling and understanding the  
291 epidemic in the Philippines particularly challenging, although data quality has progressively  
292 improved through time. For example, additional ICU facilities were created specifically for  
293 COVID-19 in the Philippines and were not required to report usage, likely affecting these  
294 estimates, especially early in the epidemic. Similarly, daily deaths, which are often  
295 considered the most reliable epidemic indicator internationally, have fluctuated markedly

296 over the course of the epidemic, often peaking at times that appear contradictory to patterns  
297 of confirmed cases. Although reporting of daily deaths appears unreliable, cumulative deaths  
298 align reasonably well with the model projections of mortality without significant  
299 modification to the internationally estimated infection-fatality rate. Finally, there is  
300 uncertainty around all model parameters, with some parameters less well constrained than  
301 others (e.g., case detection rate), which highlights the need for more epidemiological  
302 information. Future studies could build on this effort by including new, more robust data  
303 sources for model parameters and calibration targets.

304

## 305 CONCLUSION

306 One of the most critical issues facing countries around the world is determining the best  
307 strategy for successfully easing lockdown measures without triggering disease resurgence.  
308 More than 188 countries have been affected by COVID-19 with apparently less severe  
309 impacts in LMIC compared with HIC. Our results suggest that COVID-19 epidemiology is  
310 similar in the Philippines, while the differences in impacts are likely driven by differences in  
311 age and contact structures, with MHS also playing a substantial role in mitigating the  
312 outbreak. The Philippines has experienced one of the largest outbreaks of COVID-19 in the  
313 Western Pacific Region but also provides an approach that could help other countries relax  
314 interventions more safely, which is becoming increasingly important as Northern Hemisphere  
315 countries enter winter, when influenza-like illnesses tend to peak.

## 316 List of abbreviations

|          |                          |
|----------|--------------------------|
| CDR      | Case detection rate      |
| COVID-19 | Coronavirus disease 2019 |

|      |                                  |
|------|----------------------------------|
| HIC  | High-income countries            |
| ICU  | Intensive care unit              |
| LMIC | Low- and middle-income countries |
| MHS  | Minimum Health Standards         |
| NPI  | Non-pharmaceutical intervention  |

317

318 DECLARATIONS

319 Ethic approval consent to participate

320 Not applicable.

321

322 Consent for publication

323 Not applicable.

324

325 Availability of data and materials

326 The data analysed during the current study and model code are publicly available at

327 [https://github.com/monash-emu/AuTuMN/tree/phl\\_paper\\_branch](https://github.com/monash-emu/AuTuMN/tree/phl_paper_branch).

328

329 Competing interests

330 The authors declare that they have no competing interests.

331

332 Funding

333 This work was supported by the World Health Organization Regional Office for the Western  
334 Pacific to provide modelling advice to Member States. JMS is supported by a NASA  
335 Ecological Forecasting grant (NNX17AI21G). EDLT, TRT, MRJEE, and RFRS are  
336 supported by a project grant from the Philippine Council for Health Research and  
337 Development, Department of Science and Technology, Philippines. JMT is supported by an  
338 Early Career Fellowship from the National Health and Medical Research Council  
339 (APP1142638). The funding bodies had no role in the study design, analysis, interpretation of  
340 data, and in writing the manuscript.

341

342 Authors' contributions

343 JMC, MA, RR, and JMT conceptualised and designed the work. JMC, EDLT, TRT, and  
344 RNFL acquired the data. JMC, EDLT, TRT, RFRS, RNFL, RTG, JGW, RR, and JMT  
345 interpreted the data. MRJEE, MA, and JMT created software used in this work. JMC drafted  
346 the manuscript and all authors substantially revised the draft. All authors approved the  
347 submitted version of the manuscript and are accountable for their own contributions to the  
348 work.

349

350 Acknowledgements

351 Not applicable.

352

353 **Figure 1. Age-structured COVID-19 model informed with population size, contact rates,**  
354 **and mobility from the Philippines.** (A) Unstratified model structure, coloured by infectious  
355 state (blue = non-infectious; pink = moderately infectious; red = highly infectious). (B)  
356 Stratification by infection and detection status (same colour scheme as in A). (C) Starting  
357 population age distribution used in the Philippines national model. (D) Heterogeneous mixing  
358 matrices by age in the absence of NPIs (brighter colours indicate higher contact rates). (E)  
359 Community quarantine driven mobility adjustments applied to the mixing matrices (before  
360 seven-day moving average smoothing). Other locations include average from retail and  
361 recreation, supermarket and pharmacy, parks, and public transport. We provide panels C and  
362 E for the regional models in Fig. S4.

363 **Figure 2. Model reproduced daily confirmed case count better with the inclusion of**  
364 **Minimum Health Standards (MHS).** We calibrated the national model to daily confirmed  
365 cases (black dots; same in both plots with different y-axes), which included MHS (left) and  
366 ran a counterfactual scenario that did not include MHS (right). Each plot shows the median  
367 modeled detected cases (blue line) with shaded areas representing the 25th to 75th centile  
368 (dark blue) and 2.5th to 97.5th centile (light blue) of estimated detected cases. The red curve  
369 represents the effect of MHS (i.e., reduced transmission risk per contact) in the model  
370 through time. The MHS effect value is squared in the model to account for the reduction in  
371 the probability of an infected person passing on the infection and the probability of a contact  
372 being infected, prior to adjustment of each cell of the mixing matrix. We provide results for  
373 the regional models with and without MHS in Figs. S5-7.

374 **Figure 3: Model fit to confirmed cases in three regions of the Philippines, which varied**  
375 **in magnitude.** Each plot shows the regional daily confirmed cases (black dots) overlaid on  
376 the median modeled detected cases (blue line), with shaded areas representing the 25th to  
377 75th centile (dark blue) and 2.5th to 97.5th centile (light blue) of estimated detected cases.

378 **Figure 4. Model estimated epidemic indices from the calibrated Philippines model.**  
379 Modeled median cumulative deaths, ICU occupancy, incidence, and percentage of the  
380 population recovered from COVID-19 (blue line) with shaded areas for 25th to 75th centile  
381 (dark blue) and 2.5th to 97.5th centile (light blue) and overlaid with reported cumulative  
382 deaths and ICU occupancy (black dots). Note that only the most recent estimate of  
383 cumulative deaths and ICU occupancy were included in the likelihood function, with the  
384 other time points presented as validation. ICU occupancy data was considered to have  
385 improved over the course of the epidemic. We provide equivalent regional model outputs in  
386 Figs. S8-10.

387 **Figure 5. Epidemic scenario projections for detected cases from the Philippines national**  
388 **model, showing high sensitivity to compliance with the Minimum Health Standards**  
389 **(MHS).** Median estimates of daily confirmed cases expected under different policy changes  
390 (left). Median estimates of daily confirmed cases (lines) with 25th to 75th centiles (dark  
391 shading) and 2.5th to 97.5th centiles (light shading) for the baseline scenario (where current  
392 conditions are carried forward) and for the scenario where MHS policy ends. We provide  
393 epidemic scenario projections for the regional models in Figs. S13-15.

394



395 **Table 1. Key parameter prior and posterior distributions from the Philippines model.**  
 396 All parameters with the term “adjuster” allow for modification to the best estimates from the  
 397 literature. Adjuster values are multiplicative factors applied to the odds ratio. An adjuster  
 398 value of one indicates no adjustment is needed, a value below one indicates the parameter is  
 399 lower in the Philippines, and a value above one indicates the parameter is higher in the  
 400 Philippines. MHS is the Minimum Health Standards and refers to the microdistancing  
 401 function that proportionally reduces the probability of transmission given contact.  
 402

| Parameter                                                                     | Prior distribution | Prior distribution parameters                                    | Posterior centiles |       |        |
|-------------------------------------------------------------------------------|--------------------|------------------------------------------------------------------|--------------------|-------|--------|
|                                                                               |                    |                                                                  | 2.5th              | 50th  | 97.5th |
| Incubation period (days)                                                      | Truncated normal   | Mean 5.5, standard deviation 0.97, truncated range [1, infinity) | 3.31               | 5.64  | 8.62   |
| Duration actively infectious (days)                                           | Truncated normal   | Mean 6.5, standard deviation 0.77, truncated range [4, infinity) | 5.5                | 7.0   | 8.3    |
| Infection risk per contact                                                    | Uniform            | Range 0.02-0.04                                                  | 0.026              | 0.029 | 0.033  |
| Symptomatic proportion adjuster                                               | Truncated normal   | Mean 1, standard deviation 0.2, truncated range [0.5, infinity)  | 0.71               | 0.98  | 1.32   |
| Infection fatality adjuster                                                   | Truncated normal   | Mean 1, standard deviation 0.2, truncated range [0.5, infinity)  | 0.67               | 0.87  | 1.58   |
| hospitalisation proportion adjuster                                           | Truncated normal   | Mean 1, standard deviation 0.2, truncated range [0.5, infinity)  | 0.72               | 1.02  | 1.39   |
| Maximum effect of MHS (proportion)                                            | Uniform            | Range 0.1-0.6                                                    | 0.15               | 0.23  | 0.32   |
| Case Detection Rate at testing rate of 1 test per 10,000 per day (proportion) | Uniform            | Range 0.02-0.11                                                  | 2.04%              | 6.97% | 10.88% |
| Infectious seed (persons)                                                     | Uniform            | Range 10-100                                                     | 14.22              | 61.84 | 94.53  |

403  
 404  
 405  
 406  
 407  
 408  
 409  
 410  
 411

412 References

- 413 1. Zhang J, Litvinova M, Liang Y, Wang Y, Wang W, Zhao S, et al. Changes in contact  
414 patterns shape the dynamics of the COVID-19 outbreak in China. *Science* (80- ). 2020
- 415 2. O’Driscoll M, Dos Santos GR, Wang L, Cummings DAT, Azman AS, Paireau J, et al.  
416 Age-specific mortality and immunity patterns of SARS-CoV-2. *Nature*. 2020
- 417 3. Ma Y, Pei S, Shaman J, Dubrow R, Chen K. Role of air temperature and humidity in  
418 the transmission of SARS-CoV-2 in the United States 2. *medRxiv*. 2020
- 419 4. Dowd JB, Block P, Rotondi V, Mil MC. Dangerous to claim “no clear association”  
420 between intergenerational relationships and COVID-19. *Proc Natl Acad Sci*. 2020
- 421 5. Brandén M, Aradhya S, Kolk M, Härkönen J, Drefahl S, Malmberg B, et al.  
422 Residential Context and COVID-19 Mortality among the Elderly in Stockholm: A  
423 population-based, observational study. Stockholm University; 2020
- 424 6. Richardson S, Hirsch JS, Narasimhan M, Crawford JM, McGinn T, Davidson KW, et  
425 al. Presenting Characteristics, Comorbidities, and Outcomes Among 5700 Patients  
426 Hospitalized With COVID-19 in the New York City Area. *JAMA*. 2020
- 427 7. Rashed EA, Koderá S, Gomez-Tames J, Hirata A. Influence of Absolute Humidity,  
428 Temperature and Population Density on COVID-19 Spread and Decay Durations:  
429 Multi-Prefecture Study in Japan. *Int J Environ Res Public Health*. 2020
- 430 8. Kadi N, Khelfaoui M. Population density, a factor in the spread of COVID-19 in  
431 Algeria: statistic study. *Bull Natl Res Cent*. 2020
- 432 9. Halliday JEB, Hampson K, Hanley N, Lembo T, Sharp JP, Haydon DT, et al. Driving  
433 improvements in emerging disease surveillance through locally relevant capacity  
434 strengthening. Vol. 357, *Science*. American Association for the Advancement of  
435 Science; 2017. p. 146–8.
- 436 10. Xu S, Li Y. Beware of the second wave of COVID-19. Vol. 395, *The Lancet*. Lancet  
437 Publishing Group; 2020. p. 1321–2.
- 438 11. Hamadani JD, Hasan MI, Baldi AJ, Hossain SJ, Shiraji S, Bhuiyan MSA, et al.  
439 Immediate impact of stay-at-home orders to control COVID-19 transmission on  
440 socioeconomic conditions, food insecurity, mental health, and intimate partner  
441 violence in Bangladeshi women and their families: an interrupted time series. *Lancet*  
442 *Glob Heal*. 2020;8(11):e1380–9.
- 443 12. Hogan AB, Jewell BL, Sherrard-Smith E, Vesga JF, Watson OJ, Whittaker C, et al.  
444 Potential impact of the COVID-19 pandemic on HIV, tuberculosis, and malaria in low-  
445 income and middle-income countries: a modelling study. *Lancet Glob Heal*.  
446 2020;8(9):e1132–41.
- 447 13. López L, Rodó X. The end of social confinement and COVID-19 re-emergence risk.  
448 *Nat Hum Behav*. 2020;4(7):746–55.
- 449 14. Haug N, Geyrhofer L, Londei A, Dervic E, Desvars-Larrive A, Loreto V, et al.  
450 Ranking the effectiveness of worldwide COVID-19 government interventions. *Nat*  
451 *Hum Behav*. 2020;1–10.
- 452 15. UP Expert: PH has Flattened COVID-19 Curve, but is Not Reason to be Complacent |  
453 BCG News. Baguio City Guide. 2020. Available from:  
454 [https://www.baguiocityguide.com/up-expert-ph-has-flattened-covid-19-curve-but-  
455 what-does-flattening-of-the-curve-  
456 means/?fbclid=IwAR0UPCy0rqd\\_vvWMTbpndaHf16MLPdZRxD7AF7jxX1IHmZ  
457 6ChbINhtIJg](https://www.baguiocityguide.com/up-expert-ph-has-flattened-covid-19-curve-but-what-does-flattening-of-the-curve-means/?fbclid=IwAR0UPCy0rqd_vvWMTbpndaHf16MLPdZRxD7AF7jxX1IHmZ6ChbINhtIJg)
- 458 16. Prem K, Cook AR, Jit M. Projecting social contact matrices in 152 countries using  
459 contact surveys and demographic data. *PLoS Comput Biol*. 2017 Sep  
460 1;13(9):e1005697.

- 461 17. Haario H, Saksman E, Tamminen J. An adaptive Metropolis algorithm. *Bernoulli*.  
462 2001;
- 463 18. Laxminarayan R, Wahl B, Dudala SR, Gopal K, Mohan B C, Neelima S, et al.  
464 Epidemiology and transmission dynamics of COVID-19 in two Indian states. *Science*  
465 (80- ). 2020;370(6517):691–7.
- 466 19. Prowse TAA, Purcell T, Baía-Da-Silva DC, Sampaio V, Monteiro WM, Wood J, et al.  
467 Inferred resolution through herd immunity of first COVID-19 wave in Manaus,  
468 Brazilian Amazon. *medRxiv*. 2020;2020.09.25.20201939.
- 469 20. Seeman TE, Crimmins E. Social environment effects on health and aging: Integrating  
470 epidemiologic and demographic approaches and perspectives. *Ann New York Acad*  
471 *Sci Popul Heal aging Strength dialogue between Epidemiol Demogr*. 2001
- 472 21. McMichael TM, Currie DW, Clark S, Pogosjans S, Kay M, Schwartz NG, et al.  
473 Epidemiology of Covid-19 in a Long-Term Care Facility in King County, Washington.  
474 *N Engl J Med*. 2020;382(21):2005–11.
- 475 22. Meehan MT, Cocks DG, Caldwell JM, Trauer JM, Adekunle I, Ragonnet RR, et al.  
476 Age-targeted dose allocation can halve COVID-19 vaccine requirements. *medRxiv*.  
477 2020;2020.10.08.20208108.
- 478 23. Stein-Zamir C, Abramson N, Shoob H, Libal E, Bitan M, Cardash T, et al. A large  
479 COVID-19 outbreak in a high school 10 days after schools’ reopening, Israel, May  
480 2020. *Eurosurveillance*. 2020;25(29):2001352.
- 481 24. Nuevo CE, Sigua JA, Boxshall M, Co PAW, Yap ME. Scaling Up Capacity for  
482 COVID-19 Testing in the Philippines | Coronavirus (COVID-19) Blog Posts  
483 Collection - BMJ Journals. *BMJ Journals Blog*. 2020. Available from:  
484 [https://blogs.bmj.com/covid-19/2020/06/08/scaling-up-capacity-for-covid-19-testing-](https://blogs.bmj.com/covid-19/2020/06/08/scaling-up-capacity-for-covid-19-testing-in-the-philippines/)  
485 [in-the-philippines/](https://blogs.bmj.com/covid-19/2020/06/08/scaling-up-capacity-for-covid-19-testing-in-the-philippines/)
- 486 25. Pearson CAB, Kevin van Z, Jarvis CI, Davies N, Checchi F, Group CC-19 working, et  
487 al. Projections of COVID-19 epidemics in LMIC countries | CMMID Repository.  
488 Available from: <https://cmmid.github.io/topics/covid19/LMIC-projection-reports.html>
- 489 26. Haw NJL, Uy J, Sy KTL, Abrigo MRM. Epidemiological profile and transmission  
490 dynamics of COVID-19 in the Philippines. *Epidemiol Infect*. 2020;148:e204.  
491

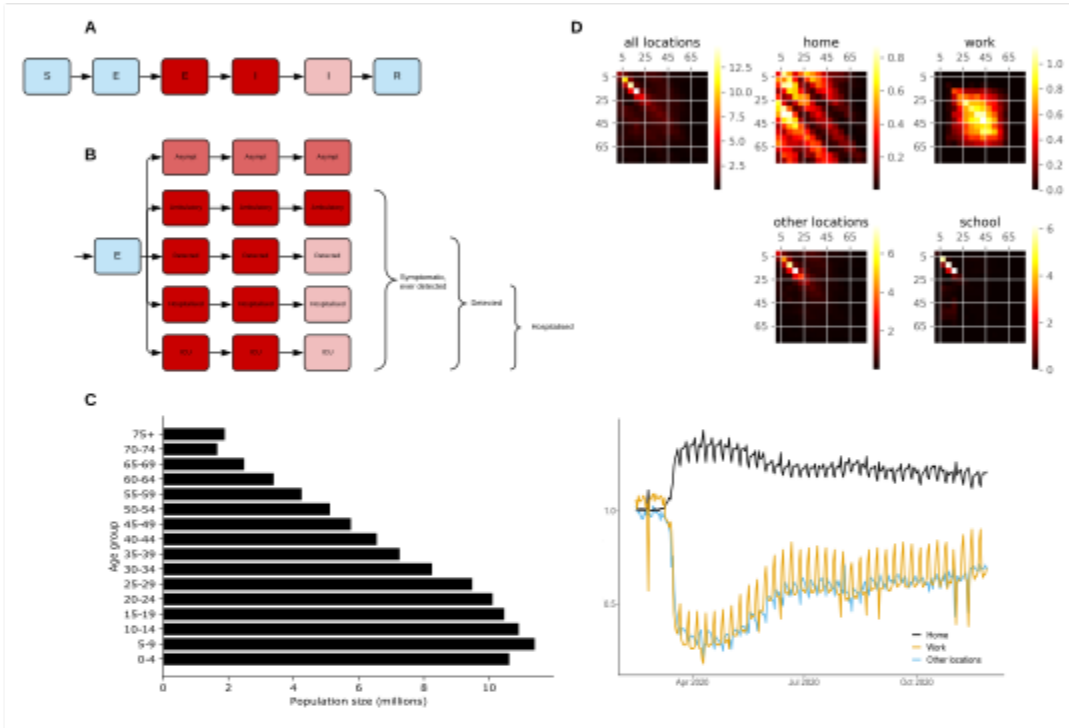

MHS incorporated

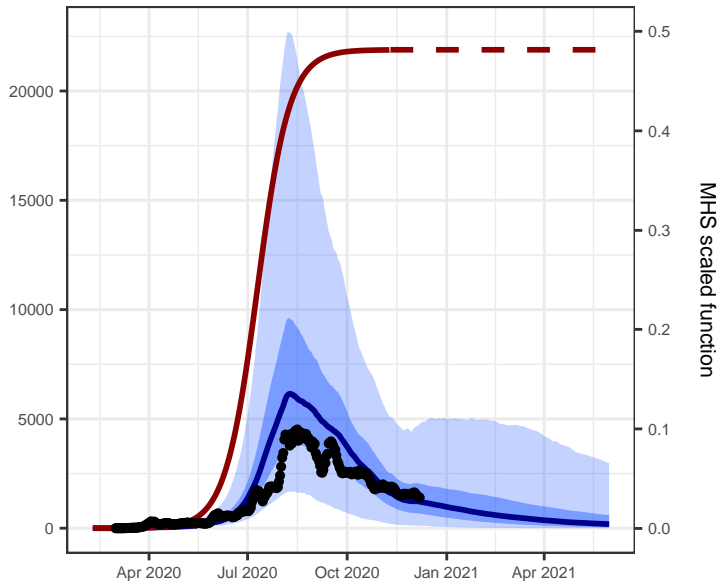

MHS not incorporated

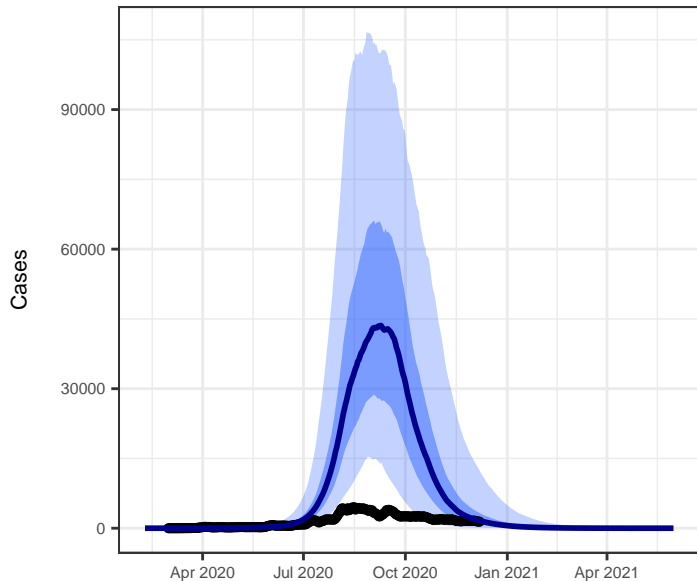

Calabarzon

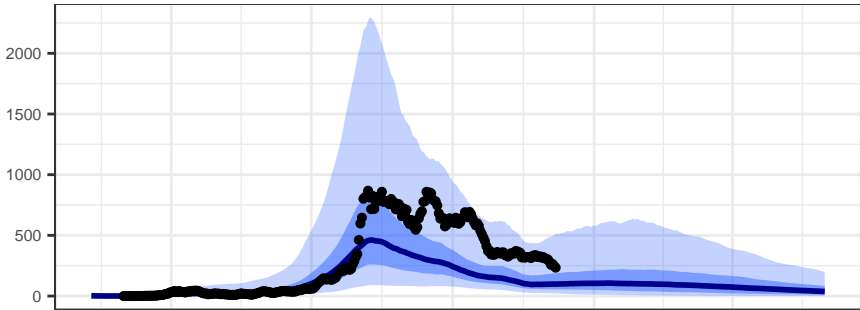

Central Visayas

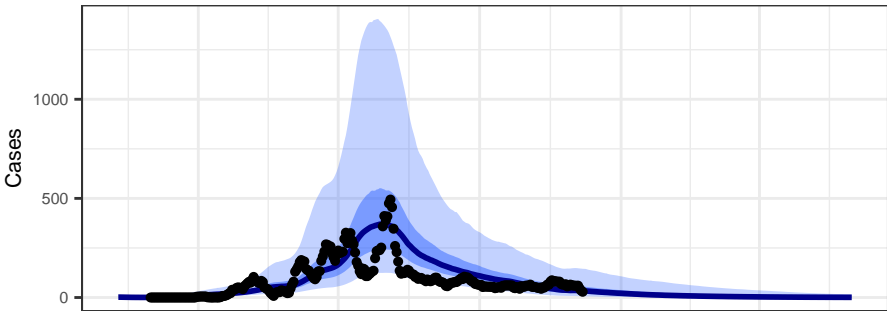

National Capital Region

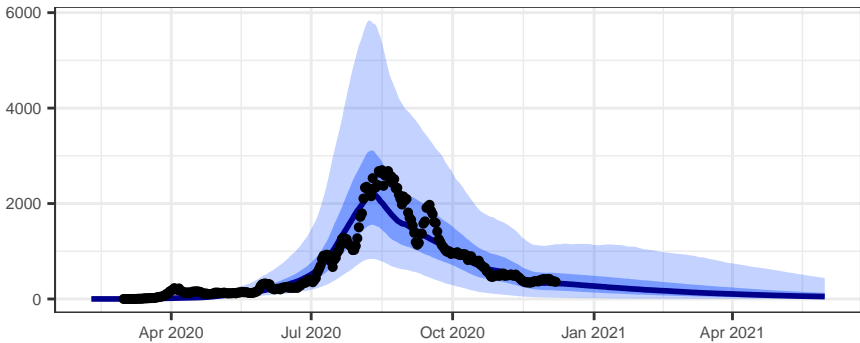

Cumulative deaths

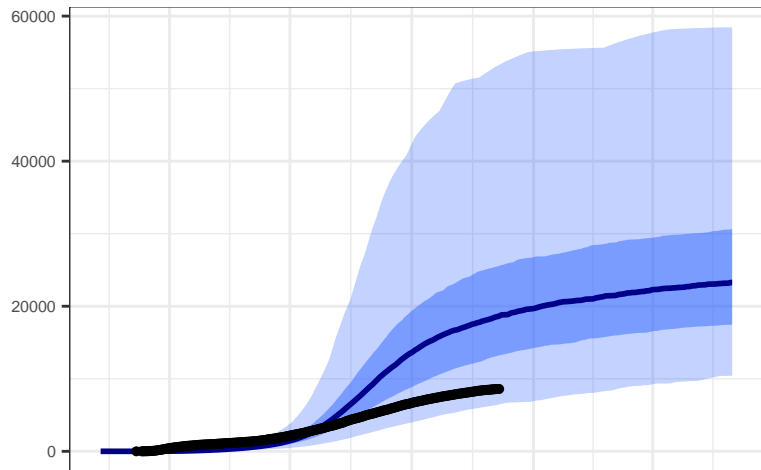

ICU occupancy

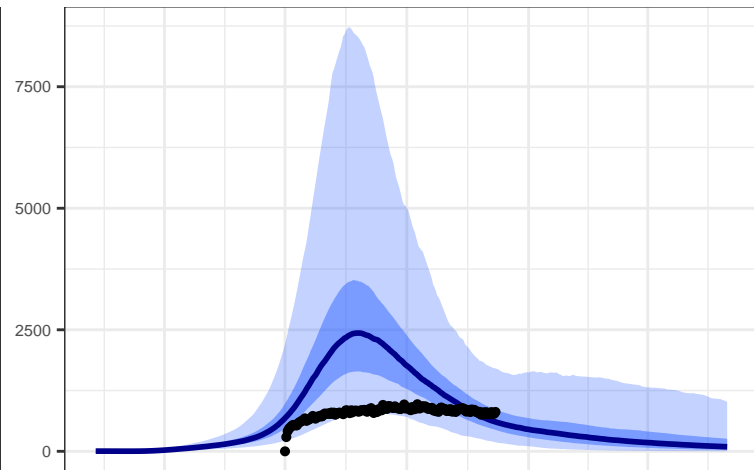

Incidence

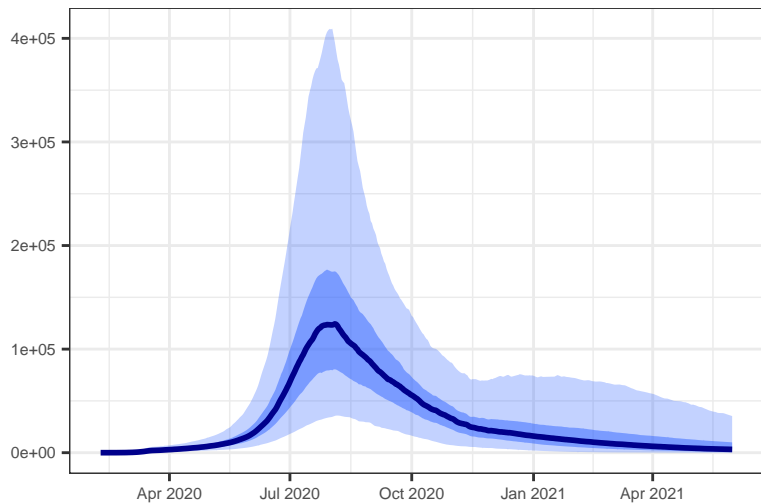

Percentage recovered

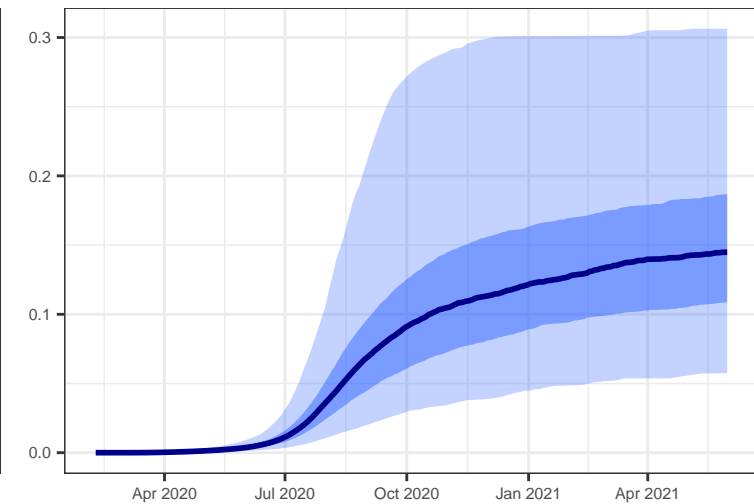

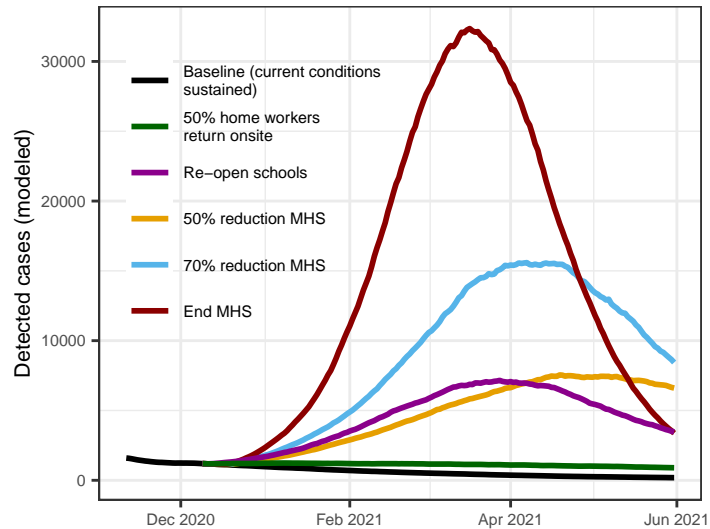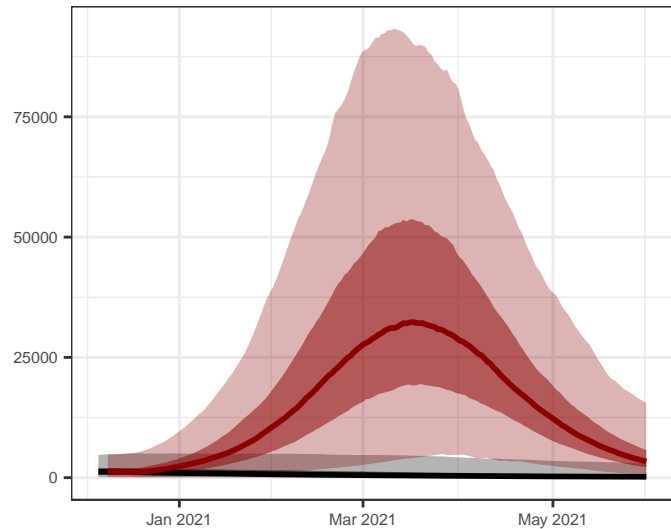



Philippines

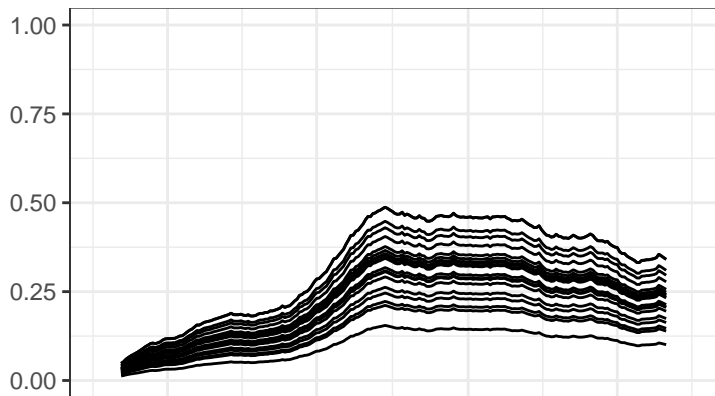

Calabarzon

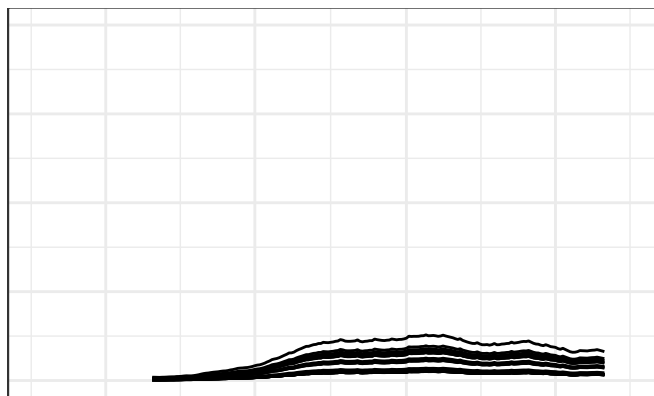

Central Visayas

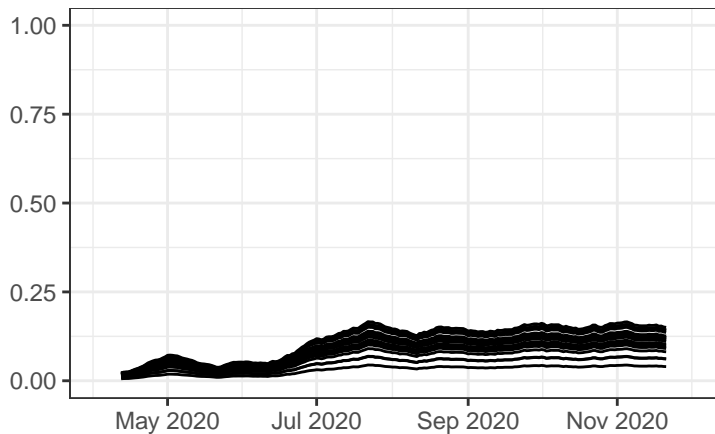

National Capital Region

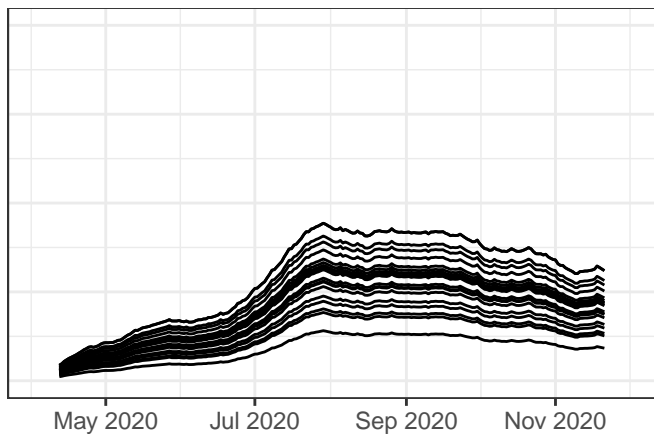

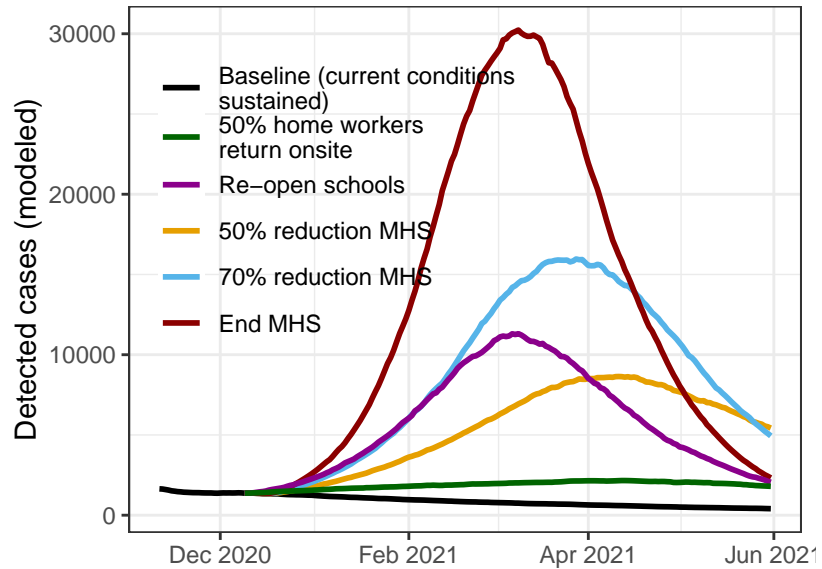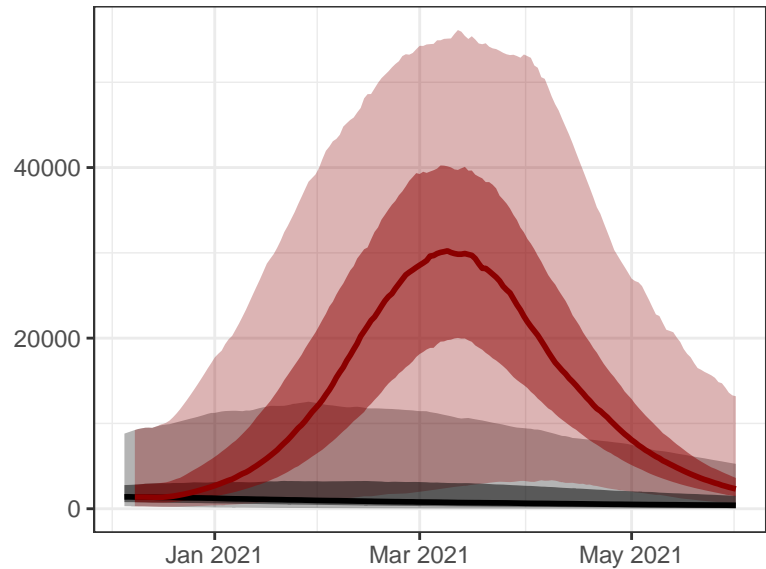

Source: https://medrxiv.org/content/10.1101/2021.01.14.21249848v1.full.pdf
